# Supplementary material
Source: publisher figshare collection journal article supplement (https://acs.figshare.com/ndownloader/files/14470367)
Supplement: Supplementary file 1 [file 14470367]

## Supporting Information

Influence of the Inclusion of Ignition Stage Emissions in the Development of Emission Factors for Coal Cookstoves used in India

Darpan Das<sup>a\*</sup>, Upendra Bhandarkar<sup>b</sup>, Virendra Sethi<sup>a</sup>

<sup>a</sup>*Centre for Environmental Science and Engineering, IIT Bombay, India*

<sup>b</sup>*Department of Mechanical Engineering, IIT Bombay, India*

*\*Corresponding Author*

The following document serves as supporting information to the main manuscript. It is provided to include various tables and figures cited in the main document.

Number of pages: 10

Number of figures: 6

Number of tables: 3

| Figures:                                                                                                                                                                                                                  | Page |
|---------------------------------------------------------------------------------------------------------------------------------------------------------------------------------------------------------------------------|------|
| Figure SI 1: Number of households using coal as a fuel for cooking (data taken from ref 3) ----                                                                                                                           | S3   |
| Figure SI 2: Photographs with key dimensions of two types of cookstoves used in the present study: a) Chandrapur Stove (CS) and b) Varanasi Stove (VS).-----                                                              | S5   |
| Figure SI 3: Schematic diagram of the measurement setup for sampling of PM <sub>&lt;2.5</sub> µm, CO and CO <sub>2</sub> emissions from cookstoves used for the present study. -----                                      | S6   |
| Figure SI 4: Size range of the coal used for the present study (a) Photograph of coal, (b) size frequency distribution plot for length (largest dimension), width (smallest dimension) and volume average diameter. ----- | S7   |
| Figure SI 5: MCE based on one-minute resolution of CO and CO <sub>2</sub> measurements of CL1, CL2 and CB in (a) VS and (b) CS -----                                                                                      | S8   |

27 Figure SI 6: Results of the measurements of  $PM_{<2.5\mu m}$  and CO for the complete combustion  
 28 cycle and the cooking cycle (flaming + smoldering) for the two types of stoves: (a) and (b) for PM;  
 29 (c) and (d) for CO. -----9

30

|    |                                                                                                   |             |
|----|---------------------------------------------------------------------------------------------------|-------------|
| 31 | <b>Tables:</b>                                                                                    | <b>Page</b> |
| 32 | Table SI 1: Results of ultimate and proximate analyses for the two types of coals (CL1 and CL2)   |             |
| 33 | and coal briquettes (CB) used in the present study.....                                           | S3          |
| 34 | Table SI 2: Summary of dimensions of coal cookstoves reported in literature, and the two          |             |
| 35 | cookstoves used in the present work namely Chandrapur Stove (CS) and Varanasi Stove (VS) (NR      |             |
| 36 | = Not Reported). ....                                                                             | S4          |
| 37 | Table SI 3: Summary of measurements for $PM_{<2.5\mu m}$ , Carbon Monoxide (CO), Elemental Carbon |             |
| 38 | (EC) and Organic Carbon (OC) for Varanasi Stove (VS) and Chandrapur Stove (CS). The last two      |             |
| 39 | rows in each sub-table include the average Emission Factor (EFs) for the respective species. .    | S10         |

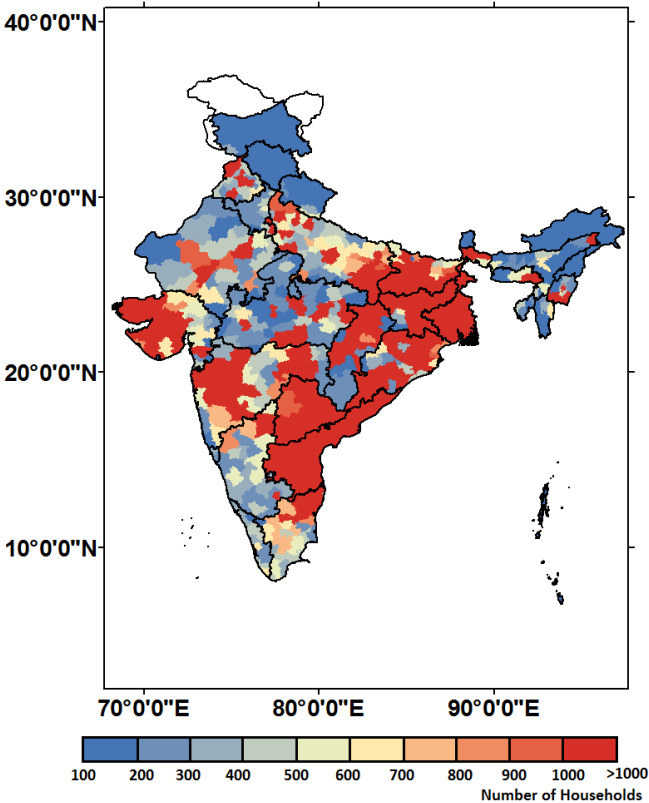

Figure SI 1: Number of households using coal as a fuel for cooking (data taken from ref 3)

Table SI 1: Results of ultimate and proximate analyses for the two types of coals (CL1 and CL2) and coal briquettes (CB) used in the present study.

| <b>ULTIMATE ANALYSIS</b>       | <b>CL1</b>  | <b>CL2</b>  | <b>CB</b>   |
|--------------------------------|-------------|-------------|-------------|
| Carbon (%)                     | 59.96       | 52.90       | 68.70       |
| Hydrogen (%)                   | 4.46        | 3.54        | 1.97        |
| Oxygen (%)                     | 13.39       | 8.84        | 7.15        |
| <b>PROXIMATE ANALYSIS</b>      |             |             |             |
| Moisture (%)                   | 6.64        | 5.18        | 4.00        |
| Volatile (%)                   | 26.77       | 27.60       | 24.70       |
| Fixed Carbon (%)               | 42.49       | 44.72       | 44.28       |
| Ash (%)                        | 24.10       | 22.50       | 27.02       |
| <b>CALORIFIC VALUE (MJ/kg)</b> | <b>23.7</b> | <b>20.0</b> | <b>24.0</b> |

48 Table SI 2: Summary of dimensions of coal cookstoves reported in literature, and the two cookstoves used in the present work namely  
49 Chandrapur Stove (CS) and Varanasi Stove (VS) (NR = Not Reported).

50

|                                                    | Oanh and co-workers <sup>4</sup> | Chen and co-workers <sup>5</sup> | Ge and co-workers <sup>6</sup> | Zhang and co-workers <sup>7</sup> | Zhi and co-workers <sup>8</sup> | Present Study |     |
|----------------------------------------------------|----------------------------------|----------------------------------|--------------------------------|-----------------------------------|---------------------------------|---------------|-----|
|                                                    |                                  |                                  |                                |                                   |                                 | CS            | VS  |
| Height (cm)                                        | 25                               | 27                               | inner = 30<br>outer = 50       | NR                                | NR                              | 18.5          | 22  |
| Outer diameter (cm)                                | 20                               | 21                               | 24                             | NR                                | 31-38.5                         | 23            | 24  |
| Inner diameter (cm)                                | 15                               | 12.5                             | 12                             | NR                                | NR                              | 22            | 20  |
| Double skinned cylinder                            | Yes                              | NR                               | NR                             | NR                                | Yes                             | No            | No  |
| Metallic outer cover                               | Yes                              | Yes                              | NR                             | Yes                               | Yes                             | No            | No  |
| Thermal insulated ceramic liner                    | Yes                              | Yes                              | NR                             | NR                                | Yes                             | No            | Yes |
| Iron grate inside separating the coal burning zone | Yes                              | Yes                              | Yes                            | NR                                | Yes                             | No            | Yes |
| Ash insulating layer                               | Yes                              | Yes                              | NR                             | NR                                | Yes                             | No            | No  |
| Chimney                                            | NR                               | NR                               | NR                             | Yes                               | Yes                             | No            | No  |
| Lid at bottom part for controlling the air supply  | NR                               | 6 cm-diameter hole               | Yes                            | NR                                | Yes                             | No            | No  |

(a) Chandrapur Stove (CS)

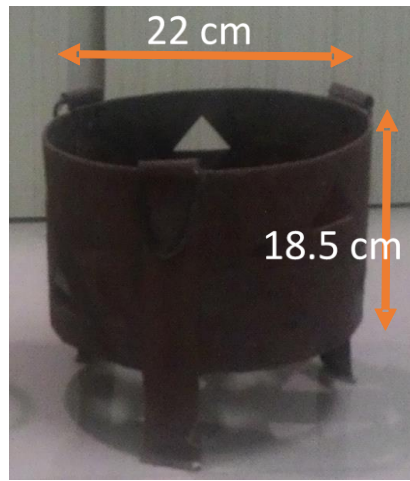

(b) Varanasi Stove (VS)

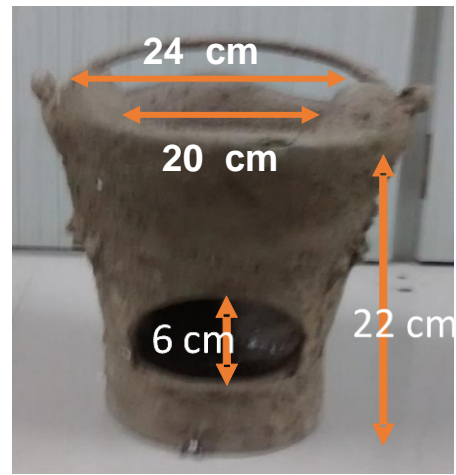

Figure SI 2: Photographs with key dimensions of two types of cookstoves used in the present study: a) Chandrapur Stove (CS) and b) Varanasi Stove (VS).

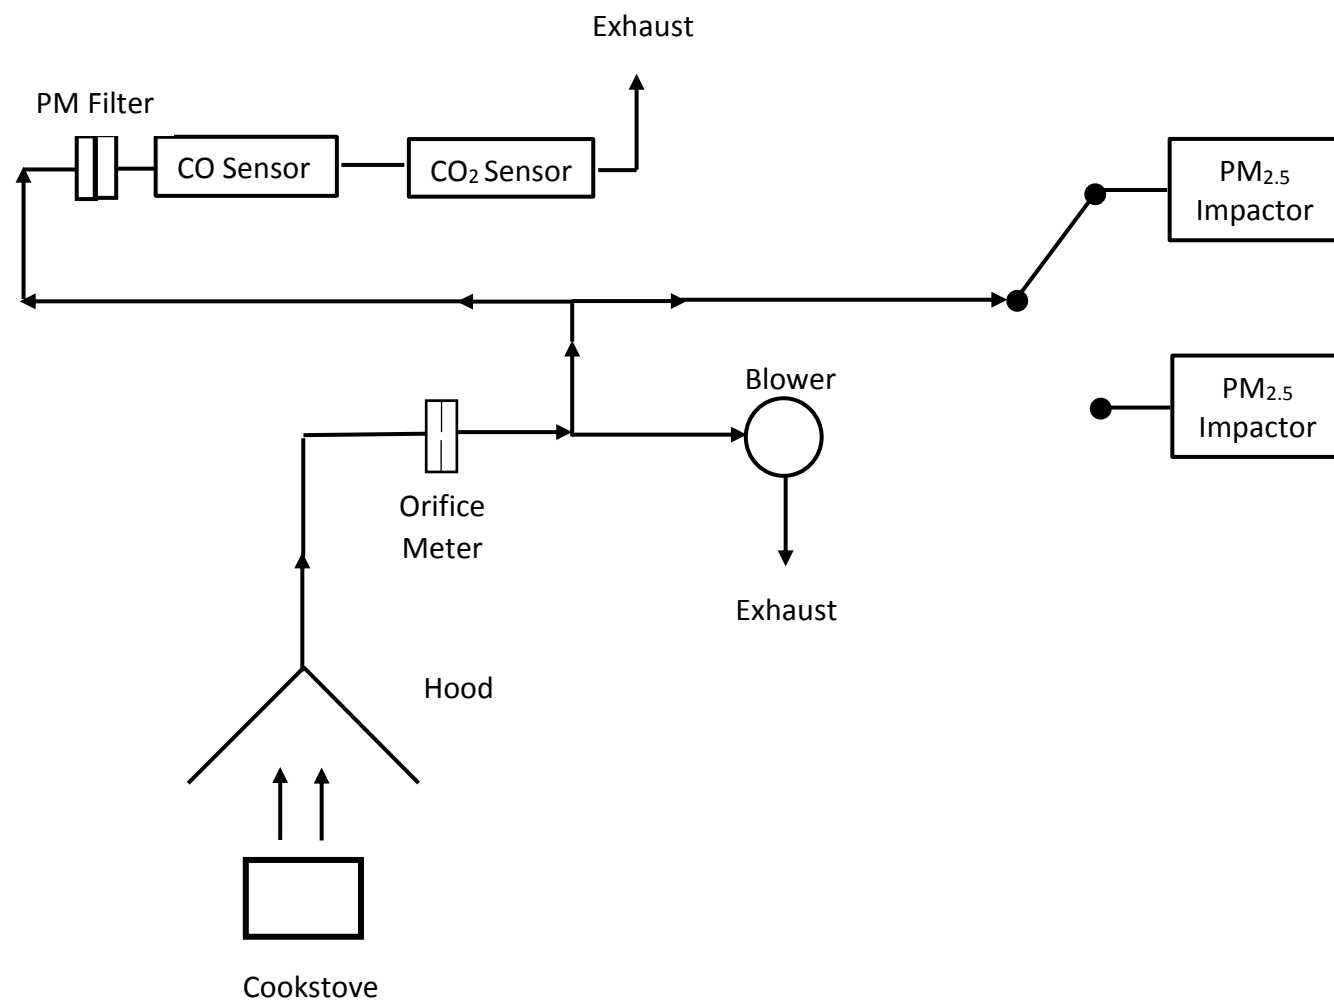

Figure SI 3: Schematic diagram of the measurement setup for sampling of PM<2.5μm, CO and CO<sub>2</sub> emissions from cookstoves used for the present study.

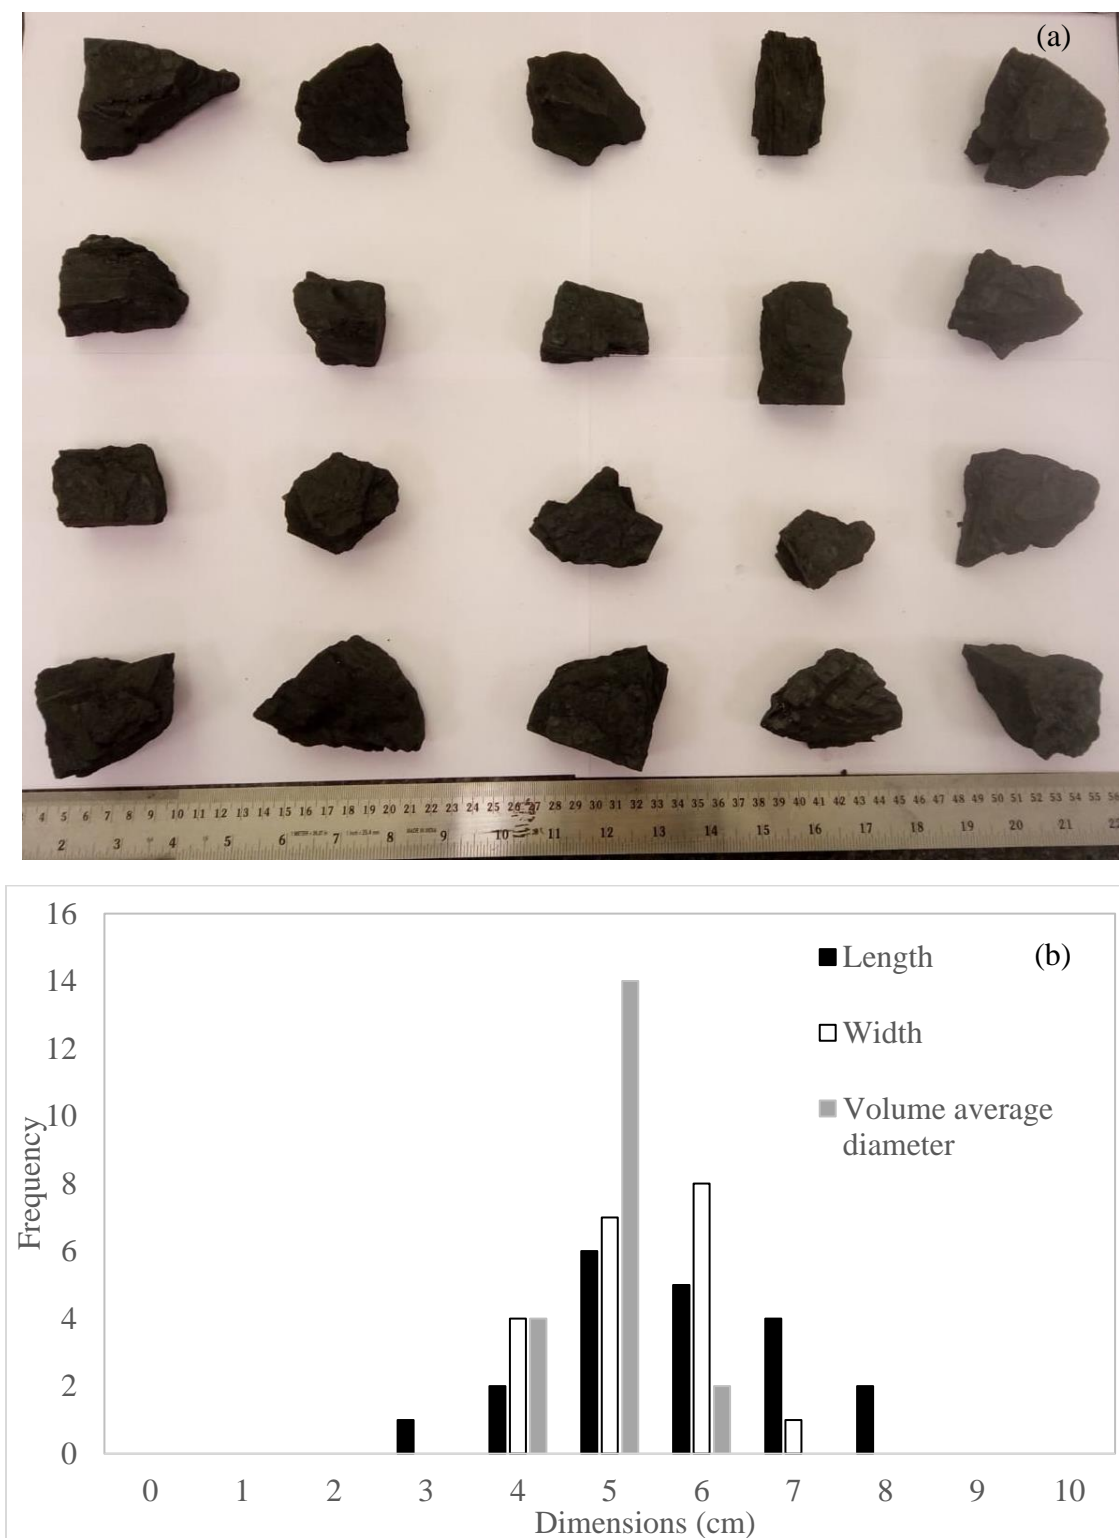

Figure SI 4: Size range of the coal used for the present study (a) Photograph of coal, (b) size frequency distribution plot for length (largest dimension), width (smallest dimension) and volume average diameter.

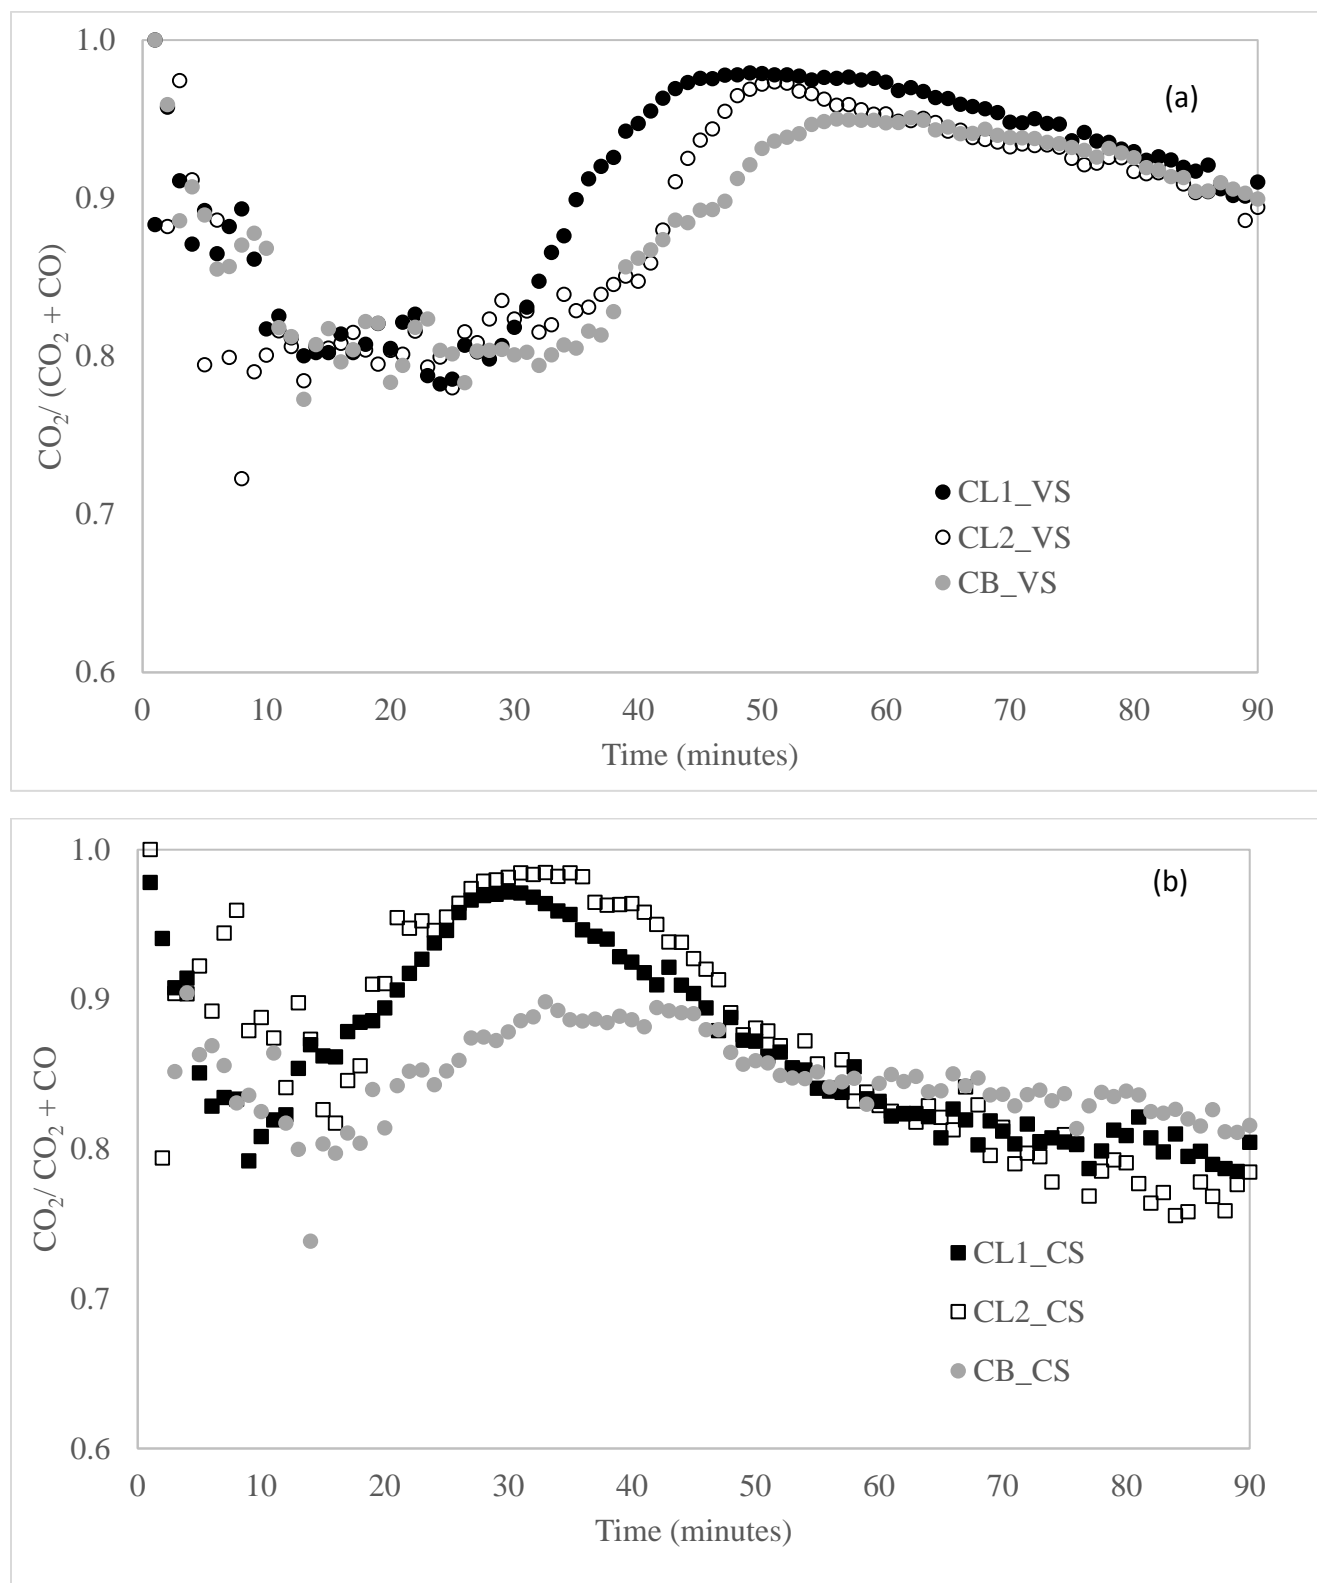

Figure SI 5: MCE based on one-minute resolution of  $\text{CO}$  and  $\text{CO}_2$  measurements of CL1, CL2 and CB in (a) VS and (b) CS



Varanasi Stove (VS)

Chandrapur Stove (CS)

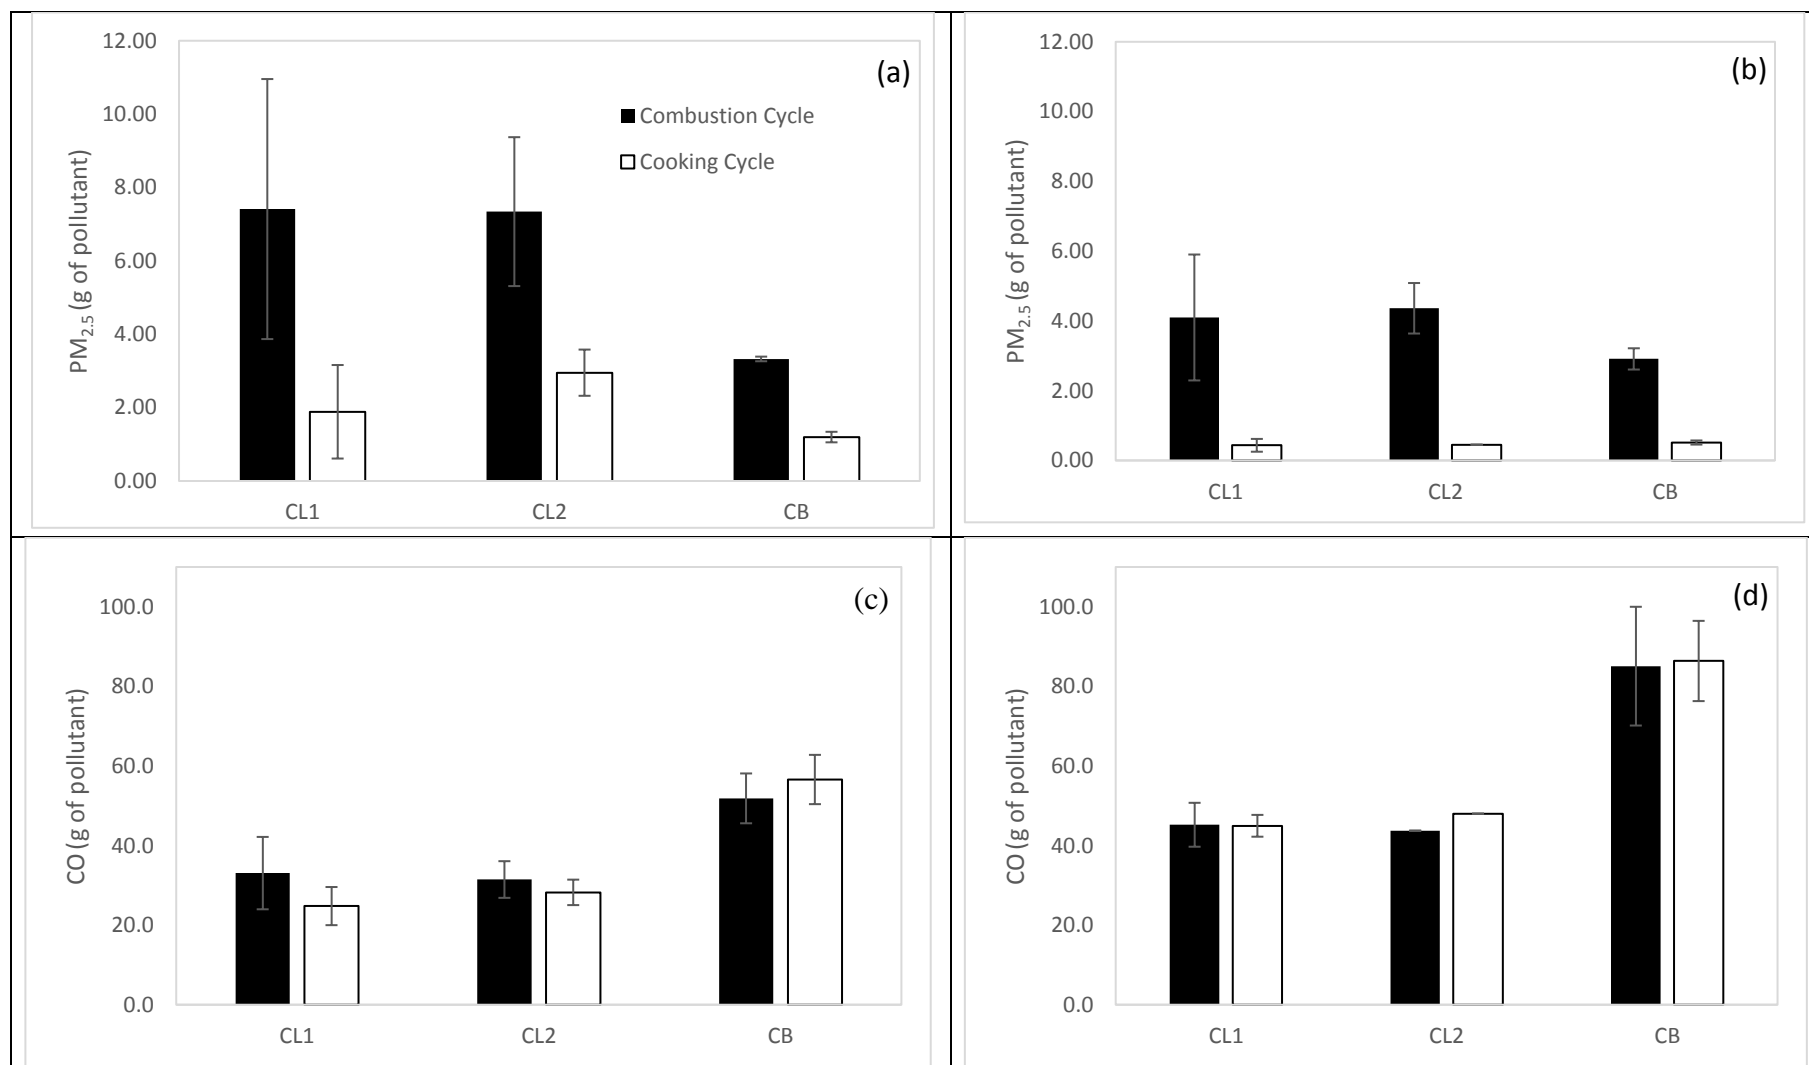

Figure SI 6: Results of the measurements of PM<sub>< 2.5μm</sub> and CO for the complete combustion cycle and the cooking cycle (flaming + smoldering) for the two types of stoves: (a) and (b) for PM; (c) and (d) for CO.

Table SI 3: Summary of measurements for PM<2.5 $\mu$ m, Carbon Monoxide (CO), Elemental Carbon (EC) and Organic Carbon (OC) for Varanasi Stove (VS) and Chandrapur Stove (CS). The last two rows in each sub-table include the average Emission Factor (EFs) for the respective species.

| Varanasi Stove (VS)            |                  |                  |                 |                  |                  |                  |      |      |      |      |      |      |
|--------------------------------|------------------|------------------|-----------------|------------------|------------------|------------------|------|------|------|------|------|------|
|                                | PM<2.5           |                  |                 | CO               |                  |                  | OC   |      |      | EC   |      |      |
|                                | CL1              | CL2              | CB              | CL1              | CL2              | CB               | CL1  | CL2  | CB   | CL1  | CL2  | CB   |
| Ignition (g)                   | 5.53 $\pm$ 2.27  | 4.39 $\pm$ 1.46  | 2.13 $\pm$ 0.21 | 16.55 $\pm$ 5.31 | 12.64 $\pm$ 2.02 | 14.13 $\pm$ 1.51 | 1.67 | 1.59 | 0.83 | 0.63 | 0.52 | 0.25 |
| Flaming (g)                    | 1.66 $\pm$ 1.09  | 2.75 $\pm$ 0.54  | 0.61 $\pm$ 0.09 | 8.64 $\pm$ 2.12  | 10.88 $\pm$ 0.28 | 20.54 $\pm$ 1.80 | 0.22 | 1.40 | 0.15 | 0.22 | 0.64 | 0.01 |
| Smoldering(g)                  | 0.23 $\pm$ 0.21  | 0.20 $\pm$ 0.10  | 0.59 $\pm$ 0.09 | 7.88 $\pm$ 0.96  | 7.95 $\pm$ 1.46  | 17.19 $\pm$ 1.12 | 0.03 | 0.09 | 0.04 | 0.00 | 0.03 | 0.00 |
| EF for Combustion Cycle (g/kg) | 13.64 $\pm$ 3.86 | 10.82 $\pm$ 1.85 | 5.70 $\pm$ 0.46 | 46.08 $\pm$ 6.08 | 50.98 $\pm$ 6.11 | 88.22 $\pm$ 2.14 | 3.12 | 4.99 | 1.64 | 1.38 | 1.94 | 0.43 |
| EF for Cooking Cycle (g/kg)    | 2.48 $\pm$ 1.51  | 4.39 $\pm$ 0.64  | 2.03 $\pm$ 0.12 | 34.97 $\pm$ 3.66 | 42.37 $\pm$ 0.48 | 96.32 $\pm$ 1.55 | 0.41 | 2.42 | 0.31 | 0.36 | 1.10 | 0.02 |

| Chandrapur Stove (CS)          |                 |                 |                 |                  |                  |                   |      |      |      |      |      |      |
|--------------------------------|-----------------|-----------------|-----------------|------------------|------------------|-------------------|------|------|------|------|------|------|
|                                | PM<2.5          |                 |                 | CO               |                  |                   | OC   |      |      | EC   |      |      |
|                                | CL1             | CL2             | CB              | CL1              | CL2              | CB                | CL1  | CL2  | CB   | CL1  | CL2  | CB   |
| Ignition (g)                   | 3.66 $\pm$ 1.62 | 3.76 $\pm$ 0.88 | 2.40 $\pm$ 0.29 | 15.25 $\pm$ 3.08 | 11.73 $\pm$ 0.00 | 27.49 $\pm$ 6.70  | 1.02 | 2.09 | 0.79 | 0.85 | 1.21 | 0.34 |
| Flaming (g)                    | 0.37 $\pm$ 0.14 | 0.60 $\pm$ 0.14 | 0.36 $\pm$ 0.06 | 13.59 $\pm$ 0.18 | 12.77 $\pm$ 0.00 | 28.77 $\pm$ 2.57  | 0.16 | 0.13 | 0.04 | 0.06 | 0.26 | 0.00 |
| Smoldering(g)                  | 0.06 $\pm$ 0.04 | 0.01 $\pm$ 0.01 | 0.16 $\pm$ 0.00 | 16.38 $\pm$ 1.31 | 19.23 $\pm$ 0.00 | 28.82 $\pm$ 2.92  | 0.03 | 0.04 | 0.03 | 0.01 | 0.00 | 0.00 |
| EF for Combustion Cycle (g/kg) | 6.52 $\pm$ 2.60 | 8.03 $\pm$ 1.33 | 5.08 $\pm$ 0.97 | 72.82 $\pm$ 4.39 | 80.53 $\pm$ 0.00 | 145.42 $\pm$ 9.11 | 2.02 | 4.16 | 1.40 | 1.52 | 2.71 | 0.56 |
| EF for Cooking Cycle (g/kg)    | 0.69 $\pm$ 0.26 | 1.12 $\pm$ 0.29 | 0.90 $\pm$ 0.18 | 72.53 $\pm$ 0.83 | 88.40 $\pm$ 0.00 | 148.29 $\pm$ 1.63 | 0.33 | 0.31 | 0.11 | 0.11 | 0.49 | 0.00 |
